# Supplementary material
Source: PubMed Central journal article supplement (PMC3319481)

## Supporting Information

### **Mechanism of NO binding to soluble guanylyl cyclase: implication for the second NO binding to the heme proximal site**

Emil Martin<sup>1\*</sup>, Vladimir Berka<sup>2</sup>, Iraidia Sharina<sup>1</sup> and Ah-Lim Tsai<sup>2\*</sup>

<sup>1</sup> Division of Cardiology, Internal Medicine, University of Texas Houston Medical School, Houston, TX, USA

<sup>2</sup> Division of Hematology, Internal Medicine, University of Texas Houston Medical School, Houston, TX, USA

**Running title:** NO binding mechanism to soluble guanylyl cyclase

#### **Corresponding Authors:**

\* Department of Internal Medicine, Division of Hematology, University of Texas Houston Medical School, Houston, Texas 77030, USA. Tel: (713)500-6771 FAX: (713)500-6810; e-mail: [ah-lim.tsai@uth.tmc.edu](mailto:ah-lim.tsai@uth.tmc.edu) .

and Department of Internal Medicine, Division of Cardiology, University of Texas Houston Medical School, Houston, Texas 77030, USA. Tel: (713)486-3442; FAX: (713)486-0450; e-mail: [emil.martin@uth.tmc.edu](mailto:emil.martin@uth.tmc.edu)

Keywords: nitric oxide, soluble guanylyl cyclase, binding mechanism.

This work was supported by grants from NIH NHLBI [grant HL088128, 3R01HL088128 (E. M.), HL095820 (A.-L.T)]; and the American Heart Association, South Central Affiliate [Grant-in-Aid 09GRNT2060182 (E. M.)].

Fig. S1. Kinetics of NO binding to sGC. NO binding was determined by mixing 5  $\mu\text{M}$  sGC and NO solution at 25 - 500  $\mu\text{M}$  range at 25  $^{\circ}\text{C}$ . Only those data that satisfy true pseudo-first order conditions are shown. The smooth red traces are the fits to a one-exponential function. The beginning < 2 ms plateau regions are the data before flow stopped, and is in the dead time of the stopped-flow instrument. The secondary plot between observed rate and  $[\text{NO}]$  in the inset was used to determine the  $k_{\text{on}}$  and  $k_{\text{off}}$  rate constants to be:  $1.1 \times 10^6 \text{ M}^{-1}\text{s}^{-1}$  and  $24.7 \text{ s}^{-1}$ , respectively.

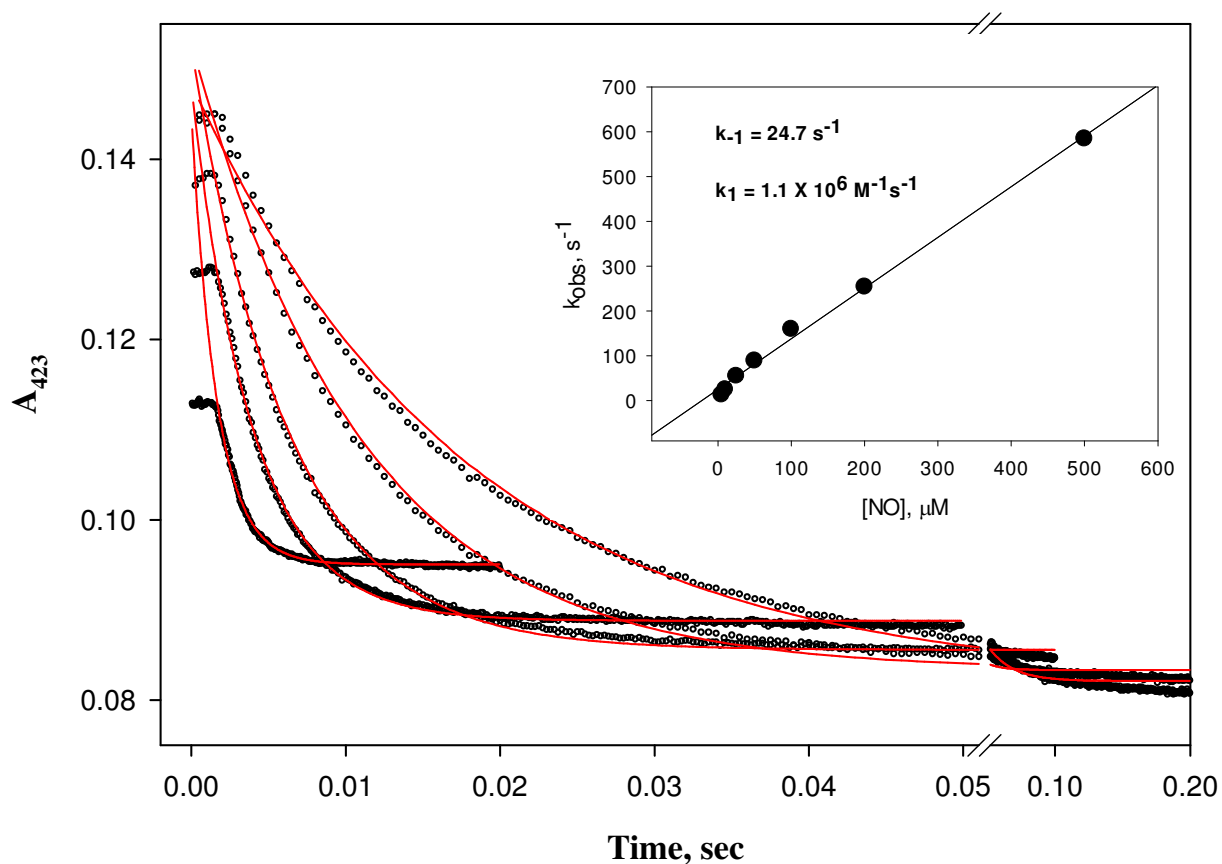

Fig. S2. Effect of anaerobic thawing/freezing on the sample trapped by sequential mixing freeze-trap EPR. EPR from samples shown in Fig. 2A and 2B ((a) and (c)) and spectra recorded after anaerobic thawing these two samples at 24 °C for 1 min and refreezing ((b) and (d)). Each spectrum was tested to be a composite of ~ 55 and ~43% of the  $^{15}\text{NO-sGC}$ , respectively.

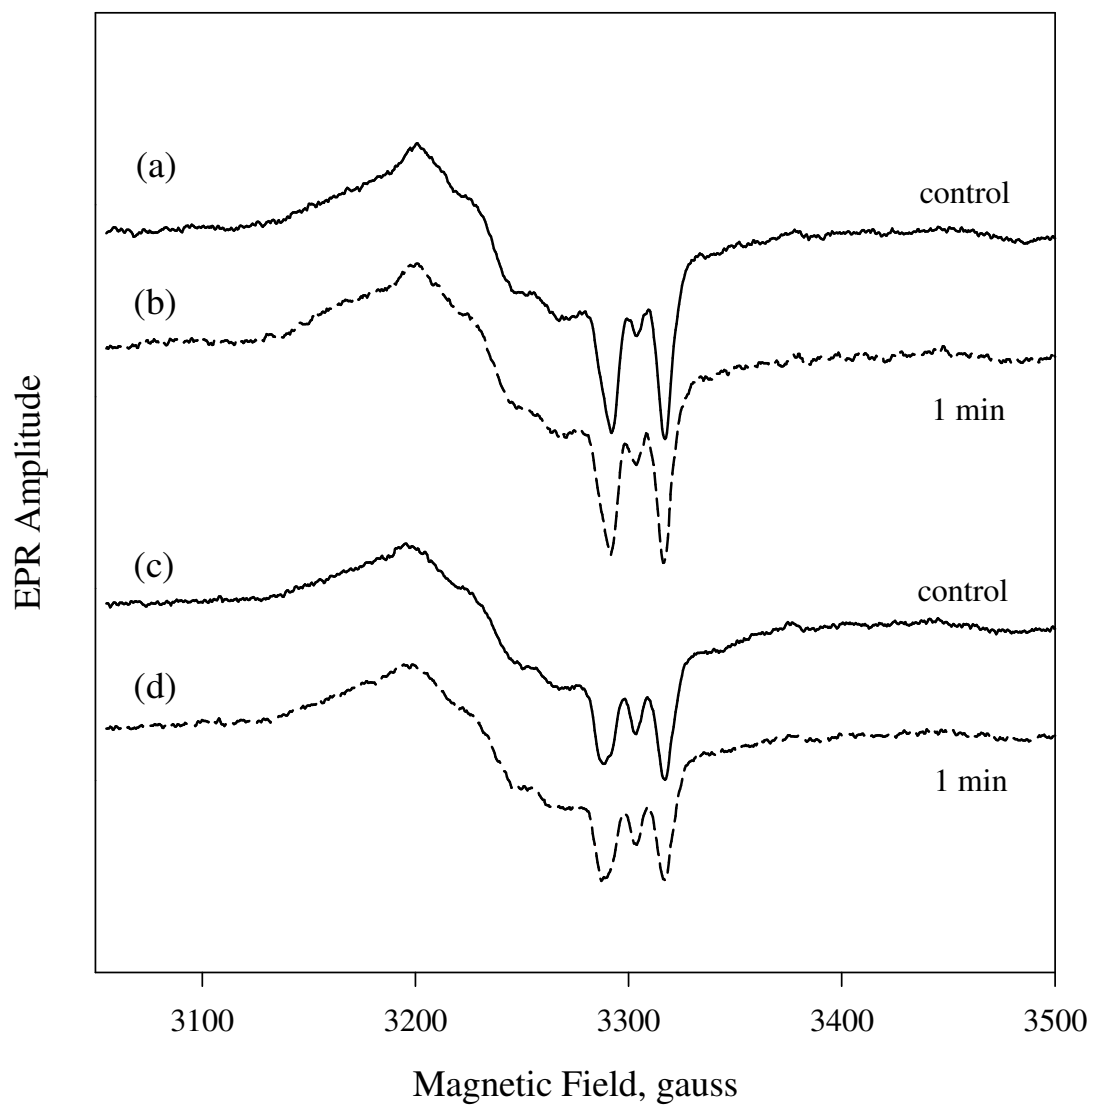

Supplement: NIHMS363517-supplement-1_si_001.pdf [file NIHMS363517-supplement-1_si_001.pdf]
